# Supplementary material for: aldh7a1 Regulates Eye and Limb Development in Zebrafish
Source: PubMed Central journal article supplement (PMC4086958; doi:10.1371/journal.pone.0101782), 2014-07-08
Supplement: pone.0101782.s001.pdf [file pone.0101782.s001.pdf]

## Supplementary Data

Figure S1

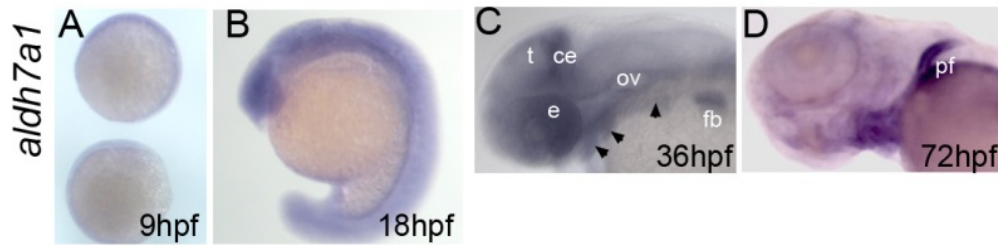

**Figure S1. *aldh7a1* expression.**

Whole-mount *in situ* hybridization shows expression of *aldh7a1* at (A) 9 hpf, (B) 18 hpf, (C) 36 hpf, and (D) 72 hpf. e, eye; t, tectum; ce, cerebellum; ov, otic vesicle; fb, fin bud; pf, pectoral fin. Arrow head indicates pharyngeal arches.

Figure S2

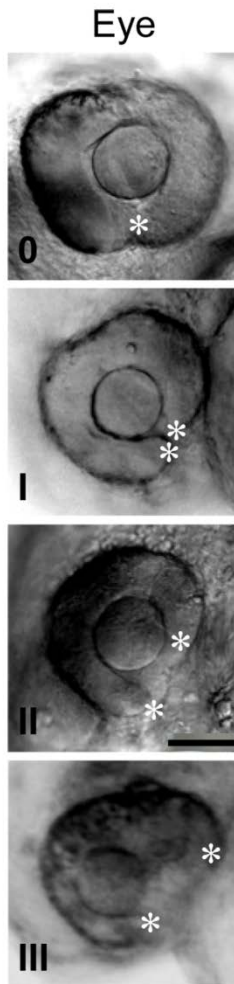

**Figure S2. Grades of severity for eye development.**

Classification of phenotype severity following morpholino injections. Four grades of coloboma (0, least severe; I, II, and III, most severe) classified by distance between edges of optic fissure at ~28 hpf, marked by white asterisks. Scale bar: 65  $\mu$ m

Figure S3

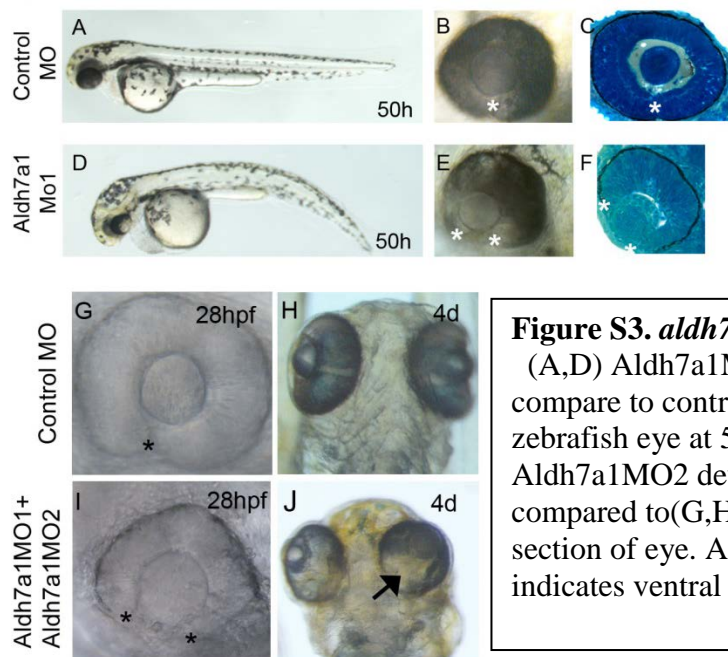

**Figure S3. *aldh7a1* loss-of-function phenotype.**

(A,D) Aldh7a1MO1 injected embryos developed bent tail compare to control MO injected embryos. (A-F) Lateral view of zebrafish eye at 50 hpf. Co-injection of Aldh7a1MO1 and Aldh7a1MO2 developed coloboma(I n=36/41, J n=25/31), compared to(G,H) control MO injected embryos.(C-F) Sagittal section of eye. Asterisks indicate edges of optic fissure, arrow indicates ventral defect in the eye at 4d.

Figure S4

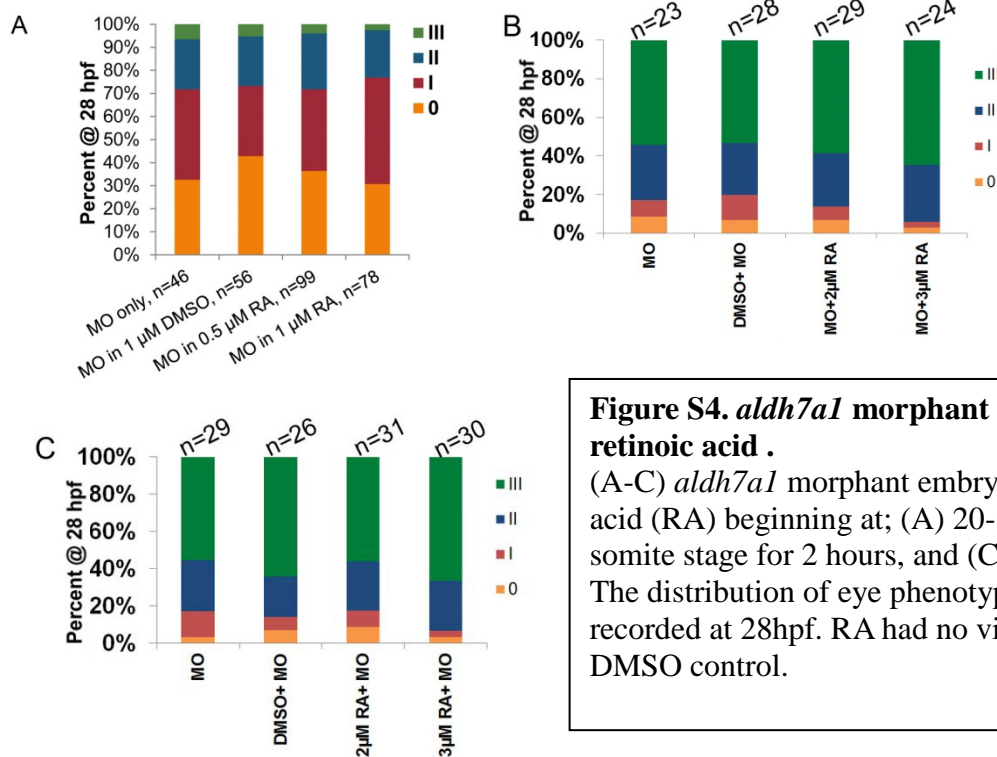

**Figure S4. *aldh7a1* morphant phenotype is not rescued by retinoic acid .**

(A-C) *aldh7a1* morphant embryos were incubated in retinoic acid (RA) beginning at; (A) 20-somite stage for 1 hour, (B) 2 - somite stage for 2 hours, and (C) 10-somite stage for 2 hours. The distribution of eye phenotypes (0, I, II, and III) was recorded at 28hpf. RA had no visible effect compared to DMSO control.

Figure S5

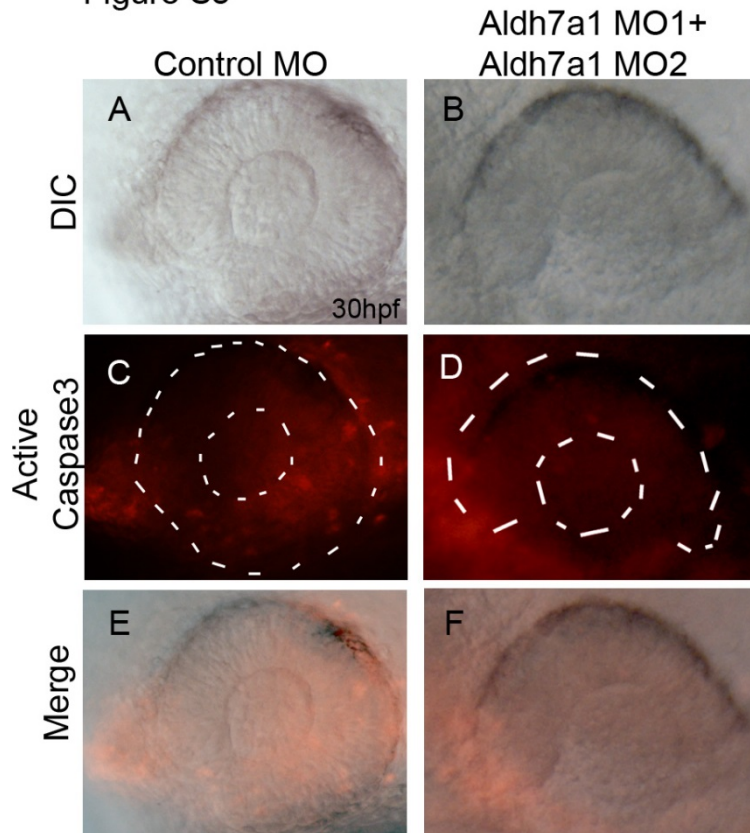

**Figure S5. Coloboma in *aldh7a1* morphant fish is not due to apoptosis.**

Active Caspase3 staining of control (C,E) and *aldh7a1* morphants embryos (D,F). White lines in C, D demarcates the eye.

Table S1:

| Gene    | cDNA IMAGE clone* | Primer <sup>†</sup> | 5'→3' Sequence                       |
|---------|-------------------|---------------------|--------------------------------------|
| aldh7a1 | 2600757           | antisenseprobe_FWD  | TGGTTGTACCGTCTGCTGTC                 |
|         |                   | antisenseprobe_REV  | CAAAACAAGGGTTGCAATGA                 |
|         |                   | ORF_FWD             | CGGAATTCCGATGTGCGACTCTGCTTATTAACCAAC |
|         |                   | ORF_REV             | CCCTCGAGGGGGCAACATCATGATTCATTCAA     |
| nlz1    | 7405421           | ORF_FWD             | GATCCAGATGAGCGAACTGC                 |
|         |                   | ORF_REV             | TAATCACTGGTACCCAAGAGCA               |
| vax2    | 9038293           | ORF_FWD             | ATGTTTGATCAAGCCACGA                  |
|         |                   | ORF_REV             | GGTAGAGGGGAGAAGATTACAGG              |

\*IMAGE clones obtained from OpenBiosystems ([www.openbiosystems.com](http://www.openbiosystems.com)); <sup>†</sup>primers obtained from BioServe ([www.bioserve.com](http://www.bioserve.com)).

**Table S1**

List of Image clones and Oligonucleotides used in this study.
